# Supplementary material for: A Transcriptional Analysis of Cattle Immune Cells Reveals a Central Role of Type 1 Interferon in the In Vitro Innate Immune Response against Mycobacterium bovis
Source: MDPI journal article supplement (doi:10.3390/pathogens12091159), 2023-09-14
Supplement: s1 [file s1]

Table S1

## Primers used in RT-qPCR

|           |                      |
|-----------|----------------------|
| RSAD2-up  | GACTGGACCTGGCTTTTCTG |
| RSAD2-low | GGCTCTGGAACTTTCTCACG |
| ISG15-up  | AGCGTGTACAAGCAGACCAG |
| ISG15-low | ACCCCGAAGACGTAGATTCA |
| ISG20-up  | AGCTACTGAGCTCCCGACAG |
| ISG20-low | GGGAATCTGACCCTGTTTCA |
| IFIT2-up  | CAGGAGGCAGAGAGACATCC |
| IFIT2-low | AGAAACTGGCAAGGCAAAGA |
| MX1-up    | CCCAAGGAGACAGGACCATA |
| MX1-low   | TAGCCCTTCTTCAGGTGGAA |

Primers used for construction of Mb04-303 $\Delta$ esxA-esxB mutant strain

|                          |                               |
|--------------------------|-------------------------------|
| (I) MutesxA/B-low        | GCGGCCGCTCGATCTGGGTTTTTCAGGTC |
| (II) MutesxA/Bphage-up   | CGATCGCGGCTCCACCAGGCCGGG      |
| (III) MutesxA/Bphage-low | CGATCGCGGCTGCGCTGCCATATC      |
| (IV) MutesxA/B-up        | AAGCTTATGTTTCGCATAGGGCAACG    |

Primers used for confirmation of *esxA-esxB* deletion in Mb04-303 $\Delta$ esxA-esxB

|           |                       |
|-----------|-----------------------|
| SigA-up   | GGCCAGCCGCGCACC       |
| SigA-low  | GTCCAGGTAGTCGCG       |
| esat6-up  | ACGTCCATTCAATCCCTCCTT |
| esat6-low | TCCCATTTTTGCTGGACACC  |
