# Supplementary material for: A Transcriptional Analysis of Cattle Immune Cells Reveals a Central Role of Type 1 Interferon in the In Vitro Innate Immune Response against Mycobacterium bovis
Source: Pathogens. 2023 Sep 14;12(9):1159. doi: 10.3390/pathogens12091159 (PMC10536033; doi:10.3390/pathogens12091159)
Supplement: Supplementary file 1 [file pathogens-12-01159-s001.zip › Table S2.xlsx]

## Sheet: Hoja 1
Table S2: Differentially expressed genes between infections with Mb04-303 and Mb534
Gene name	Seqname	Start	End	Base mean	log2(FC) 303 vs 534	StdErr	Wald-Stats	P-value	P-adj (filtered <=0,25)
KMO	chr16	35178492	35246589	54.7129	-0.665796	0.120087	-5.54426	2.95201e-08	9.66488e-05
SKA1	chr24	49979465	49995085	20.4794	-0.60985	0.165585	-3.683	0.000230503	0.0301866
ZNF367	chr8	83090034	83103558	19.5066	-0.538161	0.157509	-3.4167	0.000633859	0.0582995
SPRED1	chr10	33966318	33966756	18.669	-0.527139	0.148115	-3.55898	0.000372293	0.0413182
HNRNPLL	chr11	20909762	20910754	36.2919	-0.486751	0.145718	-3.34035	0.000836727	0.0698722
CASP8AP2	chr9	60368619	60403359	16.5118	-0.481175	0.159927	-3.00871	0.00262356	0.12873
LOC112444653	chr27	6222308	6222891	128.476	-0.462221	0.143925	-3.21155	0.00132021	0.0960523
PARPBP	chr5	65952888	66019366	32.0383	-0.455549	0.169853	-2.68202	0.00731792	0.226453
VTA1	chr9	79629633	79700288	31.0719	-0.441293	0.135861	-3.24812	0.00116169	0.0903098
CPSF6	chr5	44557295	44588381	97.0713	-0.438051	0.152735	-2.86805	0.00413007	0.172253
DIAPH2	chrX	45210222	46189286	20.3543	-0.431923	0.135838	-3.17968	0.00147437	0.102704
FCGR2A	chr3	8035854	8044372	131.54	-0.429752	0.143785	-2.98884	0.00280035	0.132874
WDR5B	chr1	66863936	66864171	19.3075	-0.427843	0.137869	-3.10325	0.00191407	0.114318
VAMP4	chr16	39145408	39171497	43.6595	-0.40541	0.111301	-3.64246	0.000270048	0.033732
NCOA7	chr9	25358452	25359171	30.5784	-0.39558	0.145457	-2.71956	0.00653689	0.212953
UBN2	chr4	102783413	102852707	62.8831	-0.384683	0.118338	-3.25072	0.00115112	0.0903098
TWSG1	chr24	41567094	41567731	32.213	-0.382104	0.129105	-2.95963	0.00308006	0.139091
SNX4	chr1	69893706	69946587	68.9709	-0.381592	0.111648	-3.41783	0.000631228	0.0582995
ELP1	chr8	98473488	98536419	19.7343	-0.37197	0.140394	-2.64947	0.00806187	0.234618
KLHL24	chr1	83444711	83482233	144.884	-0.363176	0.0696239	-5.21626	1.82574e-08	0.000239099
REV3L	chr9	38930233	39108172	55.9015	-0.36055	0.115248	-3.12846	0.00175723	0.112621
DPY19L4	chr14	69524870	69588032	20.7525	-0.350709	0.13427	-2.61198	0.00900202	0.248714
BMPR1A	chr28	41486153	41542810	23.342	-0.346294	0.126525	-2.73697	0.00620083	0.204035
FAM149B1	chr28	29237020	29293797	66.9504	-0.340727	0.111182	-3.06459	0.00217971	0.117184
CCDC88A	chr11	38012639	38128540	186.85	-0.331246	0.0775281	-4.27259	1.93213e-06	0.0062724
BMT2	chr4	55467658	55544421	67.5842	-0.330258	0.0893115	-3.69782	0.000217461	0.0301866
TMTC4	chr12	77236624	77292218	92.1408	-0.329254	0.0791359	-4.16061	3.17401e-06	0.00903627
VPS13A	chr8	53208815	53341053	63.1316	-0.327898	0.117341	-2.79439	0.00519978	0.190687
DMXL1	chr7	34636518	34762407	75.3737	-0.32529	0.0926367	-3.51146	0.000445647	0.0448938
GNAQ	chr8	53680789	53995549	472.283	-0.323364	0.0896299	-3.60777	0.000308846	0.0367203
GEN1	chr11	80822996	80851468	69.139	-0.315369	0.102892	-3.06506	0.0021763	0.117184
MAN1A2	chr3	25707097	25856582	37.1938	-0.310367	0.107707	-2.8816	0.00395661	0.168233
FAM102B	chr3	34722456	34804758	203.182	-0.309725	0.0700496	-4.42151	9.80152e-06	0.00377531
ND2	chrM	4335	5287	6614.9	-0.307571	0.0972664	-3.16215	0.00156607	0.105958
SLC30A7	chr3	42310464	42311390	40.7756	-0.303079	0.109149	-2.77675	0.00549047	0.197298
NBEAL1	chr2	91388580	91471677	78.4558	-0.30233	0.0936262	-3.22912	0.00124171	0.0923947
FRS2	chr5	43892707	44001482	74.1328	-0.299699	0.114304	-2.62193	0.00874327	0.246908
GLCE	chr10	16029612	16136658	89.684	-0.299668	0.0969925	-3.0896	0.00200424	0.116355
CASD1	chr4	11887411	11941026	78.3941	-0.297277	0.0990774	-3.00045	0.00269582	0.130114
ANXA7	chr28	29383268	29409062	702.063	-0.294618	0.0637664	-4.62028	3.8323e-06	0.0023682
SUSD1	chr8	101459472	101595478	123.394	-0.294322	0.100974	-2.91485	0.00355864	0.156389
ZDHHC2	chr27	20005861	20073513	544.704	-0.288582	0.0904736	-3.18968	0.0014243	0.101098
AP1S2	chrX	127670360	127695269	257.595	-0.284995	0.0848705	-3.358	0.000785085	0.0676694
LOC536739	chr27	14130914	14171964	79.0251	-0.28233	0.0903015	-3.12653	0.00176884	0.112621
ACAP2	chr1	72150277	72322497	55.006	-0.282006	0.101975	-2.76545	0.0056845	0.198527
NFE2L2	chr2	19339443	19649655	152.584	-0.281159	0.100644	-2.79359	0.00521273	0.190687
MBNL2	chr12	74571841	74572579	41.9214	-0.278712	0.106315	-2.62158	0.00875235	0.246908
PLPP1	chr20	23736760	23824166	57.8775	-0.275944	0.0967421	-2.85237	0.0043395	0.177594
TMEM170B	chr23	44794064	44835733	636.011	-0.266362	0.0791319	-3.36606	0.000762508	0.0674717
GOPC	chr9	33189437	33229407	198.54	-0.264112	0.0857237	-3.08097	0.0020633	0.117184
MIB1	chr24	34422523	34514405	173.924	-0.262931	0.0706653	-3.72079	0.000198599	0.0282701
TMX3	chr24	8456586	8494560	140.009	-0.261125	0.0680851	-3.83527	0.000125425	0.0221969
SEPSECS	chr6	44697958	44736804	149.378	-0.260023	0.092502	-2.811	0.00493885	0.188433
SLC2A13	chr5	40813181	41332728	62.6256	-0.259424	0.0871137	-2.978	0.00290141	0.136679
ND6	chrM	13912	16338	19624.7	-0.250618	0.0819387	-3.05861	0.00222368	0.117184
SACM1L	chr22	53572982	53626226	73.3292	-0.233842	0.0879901	-2.6576	0.00786995	0.232907
EVI2A	chr19	18667314	18671629	860.003	-0.231674	0.0662178	-3.49866	0.000467602	0.0463917
FUT11	chr28	29662317	29668832	209.873	-0.231144	0.0692404	-3.33828	0.000842991	0.0698722
ATP7A	chrX	74360828	74490918	401.655	-0.223552	0.0484666	-4.61251	3.97835e-06	0.0023682
PGM2L1	chr15	53706310	53759615	189.074	-0.220075	0.0655397	-3.35789	0.000785411	0.0676694
IER3IP1	chr24	46854646	46871961	332.089	-0.215421	0.0589878	-3.65195	0.000260255	0.0334147
NDUFB2	chr4	104013555	104021809	540.218	-0.215235	0.0652296	-3.29966	0.000968027	0.0782548
SMAD5	chr7	47561083	47623339	328.643	-0.213753	0.0621702	-3.43819	0.000585619	0.0563916
RFXAP	chr12	24805683	24815709	90.2705	-0.210003	0.0784531	-2.6768	0.00743287	0.226453
TMED5	chr3	50290250	50310439	426.458	-0.209906	0.0601685	-3.48863	0.000485505	0.0474491
UBE2K	chr6	58774520	58854187	176.748	-0.209647	0.067249	-3.11747	0.00182408	0.114318
RAN	chr17	46283189	46288191	115.471	-0.207567	0.0697715	-2.97496	0.00293026	0.13702
EFR3A	chr14	9113785	9201950	759.622	-0.203411	0.0313485	-6.48872	0	5.66862e-07
ARMT1	chr9	88485465	88499287	150.866	-0.192593	0.068936	-2.7938	0.00520925	0.190687
CEP162	chr9	65172808	65264284	110.572	-0.191921	0.0708405	-2.70919	0.0067447	0.215634
ARPP19	chr10	57819058	57836976	881.714	-0.190125	0.0362154	-5.24984	1.5223e-07	0.000239099
EXOC5	chr10	69619229	69671072	579.005	-0.186258	0.0674972	-2.75949	0.0057892	0.198527
LOC112445988	chr3	50086575	50110675	559.153	-0.183494	0.0607719	-3.01939	0.00253285	0.126009
TMEM30A	chr9	14847097	14893384	1197.95	-0.17633	0.0622194	-2.83401	0.00459679	0.183535
MAN1A1	chr9	31675674	31849227	532.128	-0.170124	0.0498367	-3.41363	0.000641046	0.0582995
MAP3K15	chrX	123618932	123764964	176.249	-0.168314	0.0613974	-2.74139	0.00611794	0.202325
VMA21	chrX	33911730	33922136	490.646	-0.16663	0.0473057	-3.52241	0.000427644	0.0437533
MAGT1	chrX	74517602	74566509	1115.1	-0.166118	0.0417717	-3.97682	6.98428e-05	0.0147526
RNF11	chr3	95012020	95059033	300.154	-0.164571	0.0572582	-2.87418	0.00405076	0.170028
IREB2	chr21	30828632	30881817	371.6	-0.153361	0.0555778	-2.75939	0.00579087	0.198527
SECISBP2L	chr10	61182356	61242962	564.779	-0.153017	0.0405664	-3.77201	0.00016194	0.0261938
PDS5A	chr6	58885742	59019946	278.556	-0.151652	0.0479686	-3.16149	0.00156963	0.105958
MTDH	chr14	66504619	66561772	582.428	-0.14625	0.0504301	-2.90006	0.00373091	0.161017
GPR137B	chr28	8841691	8905105	1266.42	-0.145937	0.0539282	-2.70614	0.00680703	0.216371
NUS1	chr9	33104770	33131530	603.575	-0.13841	0.0490285	-2.82304	0.00475703	0.187645
LRRC58	chr1	65072780	65096647	543.479	-0.138124	0.0461839	-2.99074	0.00278305	0.132874
CNOT6L	chr6	92412067	92527559	317.873	-0.13613	0.0452639	-3.00747	0.00263436	0.12873
MCUR1	chr23	42869107	42890957	306.043	-0.1289	0.0464443	-2.77536	0.00551398	0.197298
ABCD3	chr3	48980801	49070167	404.273	-0.124232	0.0449947	-2.76104	0.00576184	0.198527
DLD	chr4	48953240	48981151	579.991	-0.12389	0.0417286	-2.96895	0.00298819	0.137749
KPNA3	chr12	19241564	19339430	496.208	-0.121221	0.0449038	-2.69958	0.00694269	0.219617
MTPN	chr4	99748409	99827150	2107.11	-0.1073	0.0404149	-2.65495	0.00793193	0.232907
SPTLC1	chr8	85780378	85846091	641.24	-0.106656	0.0370802	-2.87635	0.00402302	0.169953
ST7L	chr3	30657741	30786324	3793.09	-0.104134	0.0324577	-3.20829	0.00133527	0.0960806
BZW1	chr2	89470553	89483171	3879.14	-0.101484	0.0210852	-4.81304	1.48649e-06	0.0010815
TM9SF3	chr26	17853587	17912649	1620.41	-0.101064	0.0331349	-3.05009	0.00228775	0.117184
TBCC	chr23	16396618	16399431	584.166	0.0863923	0.0329945	2.61838	0.00883474	0.247222
CORO1A	chr25	26134790	26140231	4609.39	0.100674	0.0263367	3.82257	0.000132068	0.0227574
TXNDC11	chr25	10355533	10425922	1201.83	0.106275	0.0397398	2.67427	0.0074893	0.226453
LOC101906607	chr22	37420709	37439874	465.987	0.114323	0.040705	2.80857	0.00497615	0.188433
BANF1	chr29	44093703	44095669	928.97	0.119544	0.0317699	3.76282	0.000168011	0.0261938
SAMD4B	chr18	49050218	49091708	428.168	0.119967	0.0436166	2.75048	0.00595081	0.200855
LOC112442977	chr20	3850841	3975008	1504.3	0.122921	0.0389644	3.15469	0.0016067	0.107353
DPF2	chr29	43538826	43551528	760.419	0.125357	0.0445956	2.81097	0.00493931	0.188433
EIF3G	chr7	14670928	14675611	1212.02	0.126335	0.0460057	2.74606	0.00603152	0.201502
CDK9	chr11	98461781	98466338	737.667	0.132917	0.0376617	3.52924	0.000416748	0.0433154
CDC45	chr17	72702909	72732364	466.099	0.13808	0.0516462	2.67358	0.00750464	0.226453
KIAA0141	chr7	52989278	53004025	415.076	0.138963	0.0428266	3.24478	0.00117542	0.0903098
PES1	chr17	69555244	69568611	644.158	0.141641	0.0496969	2.8501	0.00437059	0.177756
TP53	chr19	27376068	27388463	606.128	0.141783	0.0355533	3.98791	6.66592e-05	0.0147526
ING5	chr3	120743898	120760639	207.252	0.142494	0.0519533	2.74274	0.00609298	0.202325
CCT7	chr11	11197285	11214755	1450.55	0.143941	0.0506174	2.8437	0.00445933	0.179139
KCTD2	chr19	56384703	56398518	835.692	0.144682	0.0522421	2.76945	0.00561514	0.198527
PSMB6	chr19	26564846	26567053	729.569	0.145161	0.0480902	3.01851	0.00254019	0.126009
PDCL3	chr11	5581291	5592029	265.744	0.145179	0.0525641	2.76194	0.00574592	0.198527
PARP14	chr1	67012306	67058601	3954.97	0.145867	0.0460348	3.16862	0.00153163	0.10557
POLR2D	chr2	4623456	4636667	356.549	0.147587	0.0528239	2.79395	0.00520681	0.190687
CRELD2	chr5	119312428	119319446	322.161	0.149003	0.0514259	2.89743	0.0037623	0.161017
PPP4C	chr25	26202261	26210325	1024.14	0.149446	0.0414733	3.60343	0.00031404	0.0367203
EIF2AK1	chr25	38030392	38065461	207.142	0.151482	0.0555109	2.72887	0.00635523	0.20807
RING1	chr23	7395509	7399419	364.999	0.152396	0.0539175	2.82646	0.00470652	0.186778
NMT1	chr19	44745505	44779202	1239.57	0.15324	0.0343766	4.45769	8.2848e-06	0.00361659
ABCF1	chr23	28394963	28407796	1085.19	0.153373	0.0502617	3.05149	0.00227711	0.117184
GPS2	chr19	27015622	27023339	1825.01	0.154811	0.0583054	2.65518	0.00792668	0.232907
TRIM28	chr18	65769334	65775448	1136.76	0.154994	0.0577828	2.68235	0.00731076	0.226453
PRPF19	chr29	37224268	37233567	609.098	0.156418	0.0429762	3.63963	0.000273029	0.033732
PSMD2	chr1	82878891	82888208	2246.53	0.156936	0.059893	2.62028	0.00878583	0.246908
EIF3D	chr5	74925197	74939509	1343.92	0.157856	0.0410807	3.84257	0.000121752	0.0221453
PYGB	chr13	42775520	42811087	226.722	0.159009	0.0586988	2.70889	0.00675092	0.215634
ZBED4	chr5	119289285	119293187	228.833	0.160165	0.0604003	2.65172	0.00800825	0.234098
EIF4A3	chr19	52468450	52480185	879.167	0.160849	0.0525667	3.05991	0.00221406	0.117184
PSMD8	chr18	48185949	48192098	1177.56	0.166169	0.0541662	3.06775	0.00215674	0.117184
SRP68	chr19	55592403	55617948	708.45	0.168666	0.051523	3.2736	0.00106189	0.0847955
FARSA	chr7	12627835	12639274	332.595	0.168768	0.0536508	3.14567	0.00165709	0.109602
XAB2	chr7	16465084	16474481	185.05	0.17125	0.0561243	3.05127	0.00227876	0.117184
LOC112443001	chr20	26264892	26275563	407.296	0.171398	0.0433689	3.95209	7.74719e-05	0.0149202
ARHGEF3	chr22	44262617	44330993	344.368	0.172467	0.0603664	2.85701	0.00427653	0.176118
SDR39U1	chr10	20731346	20744743	521.56	0.172914	0.0646035	2.67654	0.00743864	0.226453
RANGAP1	chr5	112396213	112424997	480.994	0.175542	0.051394	3.41562	0.000636375	0.0582995
TRIM25	chr19	7712594	7737271	2745.94	0.176937	0.0479158	3.69267	0.000221916	0.0301866
TRIR	chr7	12781110	12784170	591.147	0.177721	0.0579246	3.06815	0.0021539	0.117184
LOC107132617	chr7	21938636	21946576	365.447	0.178422	0.0639666	2.7893	0.00528223	0.191633
PSMB2	chr3	110137514	110174108	1213.54	0.178444	0.0570825	3.12608	0.00177152	0.112621
EHD1	chr29	43082884	43103853	742.066	0.1795	0.0440534	4.07461	460916251088724	0.0107789
VPS51	chr29	43305617	43318628	283.935	0.180604	0.0581043	3.10827	0.00188189	0.114318
MAD2L2	chr16	41997579	42003160	203.129	0.181233	0.0594099	3.05056	0.00228419	0.117184
MRPS18B	chr23	28366307	28372892	319.966	0.182461	0.0585838	3.11453	0.00184239	0.114318
LIMD2	chr19	47975187	47977562	1153.16	0.184136	0.0445963	4.12895	3.64426e-05	0.00962947
PTPN1	chr13	78534181	78597674	2004.29	0.186289	0.0519819	3.58373	0.000338723	0.0382406
PCBP1	chr11	68411200	68412798	1780.6	0.186982	0.0670575	2.78839	0.00529712	0.191633
SURF2	chr11	104263206	104278708	205.468	0.188735	0.0705042	2.67693	0.00742993	0.226453
PSMA2	chr4	78127066	78137212	1274.64	0.191107	0.0540389	3.53648	0.000405497	0.0428257
NSFL1C	chr13	59707201	59727645	631.326	0.194715	0.0550265	3.53857	0.000402297	0.0428257
ZC3HC1	chr4	93819541	93835719	181.176	0.197815	0.0637465	3.10316	0.00191469	0.114318
MED22	chr11	104249125	104255630	218.894	0.201679	0.0547527	3.68346	0.000230091	0.0301866
PSMB9	chr23	7186808	7193387	1742.53	0.201762	0.0448405	4.49955	0,000006,8098604411945	0.00342661
INTS4	chr29	18041151	18149721	148.991	0.20206	0.0686658	2.94266	0.00325401	0.144947
STAT5A	chr19	42395296	42416514	1722.34	0.205054	0.0398283	5.14844	2.62659e-07	0.000286648
TAP1	chr23	7177589	7186296	5165.48	0.205908	0.0774011	2.66027	0.00780777	0.232907
SLC44A2	chr7	15097958	15130758	1356.39	0.207074	0.0480104	4.3131	1.60978e-05	0.00554781
QSOX1	chr16	61363121	61404624	686.577	0.211149	0.0630527	3.34877	0.000811705	0.0690266
LOC101903126	chr15	46183591	46363037	109.673	0.211328	0.0712553	2.96579	0.00301907	0.137749
NFKBIE	chr23	17764122	17771909	619.406	0.213331	0.0723555	2.94838	0.00319445	0.143269
GTF2B	chr3	55014551	55045535	491.291	0.214926	0.0542986	3.95821	7.55e-05	0.0149202
C7H19orf24	chr7	43713179	43716029	170.09	0.216554	0.0808612	2.6781	0.00740413	0.226453
PSMB3	chr19	39343995	39353534	952.206	0.220982	0.0713372	3.09771	0.00195024	0.115047
DDX42	chr19	48033492	48077325	289.084	0.221731	0.0685028	3.23682	0.00120869	0.0909714
NFKBIB	chr18	48614361	48625050	301.807	0.222599	0.0819247	2.71712	0.00658527	0.213467
SSNA1	chr11	106210962	106212442	192.811	0.225417	0.0695258	3.2422	0.00118611	0.0903098
DDX56	chr4	76865601	76874947	211.259	0.227154	0.0798329	2.84537	0.00443599	0.179139
PIM3	chr5	119348702	119351730	438.895	0.227725	0.0824301	2.76264	0.0057336	0.198527
IER5	chr16	62209133	62211410	1057.21	0.231195	0.0758673	3.04736	0.0023086	0.117184
TAX1BP3	chr19	24360138	24366352	177.013	0.235231	0.0592996	3.96682	7.28382e-05	0.0149045
GRHPR	chr8	61555123	61564180	175.074	0.235641	0.08385	2.81027	0.00495003	0.188433
CNP	chr19	42130961	42138137	1697.12	0.236512	0.0753538	3.13869	0.00169705	0.111123
JUND	chr7	4912103	4913998	735.771	0.238392	0.0664857	3.58561	0.000336292	0.0382406
PARP9	chr1	66958518	66998030	1378.47	0.238982	0.0583219	4.09764	4.17385e-05	0.0105117
LOC104976739	chr25	1528827	1534840	134.415	0.242941	0.0835029	2.90937	0.00362158	0.158094
NELFA	chr6	116624412	116640174	95.5453	0.243	0.0865254	2.80842	0.00497845	0.188433
MRNIP	chr7	1417993	1446973	2820.33	0.243201	0.0652635	3.72645	0.000194192	0.0282571
GRWD1	chr18	55124744	55131169	176.937	0.243662	0.0720884	3.38004	0.000724758	0.0650098
TRIM56	chr25	35626776	35635489	842.662	0.244712	0.0450284	5.43462	5.49127e-08	0.000119856
FCHSD2	chr15	52374096	52618809	413.623	0.249617	0.0690886	3.613	0.00030267	0.0367016
IFI16	chr3	10700719	10747687	2610.27	0.260353	0.0837308	3.1094	0.00187465	0.114318
UBL7	chr21	34210072	34223496	93.3895	0.260485	0.0878606	2.96475	0.0030293	0.137749
RNF114	chr13	78003701	78017923	1484.39	0.260834	0.0654864	3.98302	6.80439e-05	0.0147526
GRAP2	chr5	111263383	111331383	50.1438	0.269439	0.0978212	2.75441	0.00587984	0.199488
IRF9	chr10	20986939	20991941	973.458	0.28253	0.106975	2.64108	0.00826414	0.239441
JAKMIP3	chr26	51821886	51835141	133.914	0.287049	0.101971	2.81501	0.00487761	0.188433
BCLAF1	chr9	74256505	74287566	38.9589	0.288733	0.109705	2.63189	0.00849113	0.244933
FBRS	chr25	26782790	26783917	123.137	0.296143	0.0971764	3.04748	0.00230768	0.117184
CD74	chr7	61747893	61755708	264.825	0.296496	0.0988417	2.9997	0.00270244	0.130114
RMDN3	chr10	36291382	36306603	91.5053	0.299727	0.112376	2.66717	0.00764931	0.22976
EPSTI1	chr12	13015360	13115340	1443.14	0.323769	0.123815	2.61494	0.00892418	0.247608
ZBTB42	chr21	69255007	69259149	33.0095	0.329667	0.119458	2.7597	0.00578545	0.198527
SLX1A	chr25	26128288	26132624	87.714	0.33009	0.0993159	3.32363	0.000888536	0.0727267
CXCR3	chrX	79040994	79063341	80.269	0.337812	0.0792317	4.2636	2.01e-05	0.0062724
UBE2L6	chr15	80816070	80829574	288.838	0.346712	0.116626	2.97285	0.00295049	0.13702
SERTAD1	chr18	49764720	49767608	332.41	0.353594	0.0774023	4.56826	4.92e-06	0.00268352
CMTR1	chr23	11318803	11372354	944.323	0.35761	0.0950004	3.7643	0.000167015	0.0261938
IFITM1	chr29	50933702	51005252	452.368	0.368456	0.140869	2.61559	0.00890729	0.247608
PRR14L	chr17	70362876	70401250	41.1628	0.376733	0.106173	3.5483	0.000387721	0.0423133
ATP7A	chrX	74468152	74470418	38.9913	0.376977	0.118273	3.18734	0.00143587	0.101098
LOC526769	chr16	51408644	51420631	21.3793	0.382108	0.145423	2.62757	0.00859976	0.245901
IFIH1	chr2	34111235	34167082	1096.37	0.384935	0.0986313	3.90277	9.51e-05	0.0177917
BAG2	chr23	3041702	3050794	34.3245	0.387342	0.137321	2.8207	0.00479193	0.187889
PARP12	chr4	103472247	103518697	26.7278	0.401507	0.146096	2.74823	0.0059918	0.201201
INSIG1	chr4	117125815	117138561	31.7899	0.401605	0.152835	2.6277	0.00859644	0.245901
RTP4	chr1	79911203	79916274	429.362	0.405025	0.150972	2.68278	0.00730125	0.226453
HNRNPL	chr18	48557938	48569529	33.8816	0.409722	0.146064	2.80508	0.00503038	0.189304
FAM193A	chr6	116020609	116105650	79.391	0.418686	0.100359	4.1719	3.02e-05	0.0089908
TOB1	chr19	35883074	35886821	15.1738	0.41912	0.159746	2.62366	0.00869894	0.246908
LY6E	chr14	1422632	1426406	864.132	0.420129	0.110718	3.79457	0.000147898	0.0248317
EML4	chr11	24556971	24558460	20.1092	0.43198	0.141441	3.05414	0.00225709	0.117184
APBA3	chr7	20214158	20241547	18.933	0.437242	0.158615	2.75662	0.00584016	0.199174
IFI44L	chr3	66053179	66071333	924.169	0.440623	0.142033	3.10227	0.00192044	0.114318
ISG20	chr21	19607458	19624701	427.816	0.45	0.12001	3.74967	0.000177067	0.0269637
MAFF	chr5	109963737	109963966	14.6456	0.466378	0.175374	2.65933	0.0078296	0.232907
LOC104969122	chr7	22395788	22397762	58.0478	0.479772	0.128617	3.73024	0.000191297	0.0282571
HERC6	chr6	36309295	36366748	1510.98	0.480704	0.108413	4.434	9.25e-06	0.00377531
CNOT3	chr18	63241771	63257192	15.4029	0.492811	0.170078	2.89756	0.00376074	0.161017
ST6GALNAC4	chr11	98573674	98582854	19.3107	0.510473	0.158512	3.22041	0.00128008	0.0941791
MIR2469	chr8	11522056	11605053	810.285	0.521298	0.182114	2.86248	0.00420335	0.1742
ZNFX1	chr13	77348732	77374980	3852.83	0.534125	0.110334	4.841	1.29e-06	0.0010815
IFIT2	chr26	11028571	11036882	360.036	0.696505	0.170519	4.08461	4.42e-05	0.0107076
LOC100139670	chr26	11059402	11078142	966.308	0.765483	0.175113	4.37137	1.23e-05	0.0044916
MX1	chr1	141678215	141706554	28.8298	0.776184	0.173101	4.48398	7.33e-06	0.00342661
ISG15	chr16	51464068	51465214	1117.56	0.814245	0.197301	4.12692	3.68e-05	0.00962947
RSAD2	chr11	90038201	90056299	674.261	0.919587	0.190497	4.82732	1.38e-06	0.0010815
